# Supplementary material for: Improving the precision of estimating carbon sequestration potential in four tree and shrub agroforestry species through the comparison of general and specific allometric equations in Côte d’Ivoire
Source: Research Square preprint supplement (doi:10.21203/rs.3.rs-4495858/v1), 2024-06-13
Supplement: Supplementary file 1 [file 245f7b1f9b42955466379460.xlsx]

## Sheet: tree_data
Tree species scientific name	Tree species common or local name	Tree height (m)	Tree circumference at breast height (cm)	Notes/observations about this tree	_id	_uuid	_submission_time	_index	_parent_table_name	_parent_index	_tags	_notes	_version	_duration	_submitted_by	_xform_id
Terminalia superba	Frake	17.24	142	None				1	data	1
Persea americana	Av0catier	53	8.76	None				2	data	1
Terminalia superba	Frake	13.34	112	None				3	data	1
Terminalia ivoriensis	Framire	18.25	125	None				4	data	1
Terminalia superba	Frake	17.23	105	None				5	data	1
Terminalia superba	Frake	14.22	98	None				6	data	1
Terminalia superba	Frake	15.62	102	N0ne				7	data	2
Ricinodendron heudolotii	Akpi	11.24	83	None				8	data	2
Terminalia superba	Frake	14.18	120	N				9	data	2
Terminalia superba	Frake	17.2	114	None				10	data	2
Theobroma cocoa	Cacao	8	35	No				11	data	2
Theobroma cocoa	Cacao	7.5	27	No				12	data	2
Theobroma cocoa	Cacao	7.33	35.2	No				13	data	2
Theobroma cocoa	Cocoa	6.84	37.25	No				14	data	2
Theobroma cocoa	Cacao	7.53	29.44	No				15	data	2
Theobroma cocoa	Cacao	7.13	33.06	No				16	data	2
Theobroma cocoa	Cacao	7.56	27.5	No				17	data	2
Theobroma cocoa	Cacao	7.15	29.05	No				18	data	2
Theobroma cocoa	Cacao	8.12	33.42	No				19	data	2
Theobroma cocoa	Cacao	8.37	27.36	No				20	data	2
Theobroma	Cacao	7.88	32.53	No				21	data	2
Theobroma cocoa	Cacao	7.41	31.52	No				22	data	2
Theobroma cocoa	Cacao	7.62	38.6	No				23	data	2
Theobroma cocoa	Cacao	8.17	40.12	No				24	data	2
Theobroma cocoa	Cacao	8.14	28.21	No				25	data	2
Theobroma cocoa	Cacao	8.7	33.25	No				26	data	2
Theobroma cocoa	Cacao	7.53	39.09	No				27	data	2
Theobroma cocoa	Cacao	7.59	34	No				28	data	2
Theobroma cocoa	Cacao	7.23	33.2	No				29	data	2
Terminalia superba	Frake	25	60	No				30	data	3
Theobroma cocoa	Cacao	3.5	15	No				31	data	3
Cocos nucifera	Cocotier	7	69	No				32	data	4
Albizia zygia	Albizia	14.8	127	No				33	data	4
Smaea dinklagei	No	3.83	8.8	No				34	data	4
Smaea dinklagei	No	3.78	7	No				35	data	4
Smaea dinklagei	No	3.76	7.6	No				36	data	4
Delonix regia	Flamboyant	3.8	9.25	No				37	data	4
Cocos nucifera	Cocotier	5.81	71	No				38	data	4
Terminalia superba	Frake	15.62	147	No				39	data	4
Ricinodendron heudolotii	Akpi	12.75	93	No				40	data	4
Delonix regia	Flamboyant	3.74	8.8	No				41	data	4
Delonix regia	Flamboyant	3.2	35.4	No				42	data	4
Delonix regia	Flamboyant	3.25	16	No				43	data	4
Irvingia gabonensis	Kple	5.08	21	No				44	data	4
Theobroma cacao	Cocoa	3.46	20.5	No				45	data	4
Theobroma cocoa	Cocoa	3.74	9.77	No				46	data	4
Theobroma cacao	Cocoa	4.12	10.34	No				47	data	4
Theobroma cacao	Cocoa	4.13	9.9	No				48	data	4
Theobroma cacao	Cocoa	3.94	16.25	No				49	data	4
Theobroma cacao	Cocoa	4.87	8.86	No				50	data	4
Theobroma cacao	Cocoa	3.94	5.33	No				51	data	4
Theobroma cacao	Cocoa	4.46	13.06	No				52	data	4
Theobroma cacao	Cocoa	4.08	10.74	No				53	data	4
Theobroma cacao	Cocoa	4.38	12	No				54	data	4
Terminalia superba	Frake	15.78	130	No				55	data	4
Theobroma cacao	Cocoa	3.56	9.25	No				56	data	4
Ficus mucuso	Ficus	14.76	105	No				57	data	5
Theobroma cacao	Cocoa	5.35	42.5	Dry branchs				58	data	5
Theobroma cacao	Cocoa	5.76	56	Dry branchs				59	data	5
Theobroma cocoa	Cocoa	4.98	5.21	Lichens and dry branchs				60	data	5
Ficus sur	Ficus	4.71	19.25	No				61	data	5
Ficus exasperata	Yengle (baoule)	4.42	11.5	No				62	data	5
Theobroma cacao	Cocoa	5.12	34	Dry leaves				63	data	5
Ficus mucuso	Ficus	4.7	27.5	No				64	data	5
Albizia zygia	Okouro	9.71	46.25	No				65	data	5
Albizia zygia	Okouro	9.82	52.1	No				66	data	5
Ficus sur	Ficus	6.75	27.75	No				67	data	5
Trichilia monadelpha	Dra (gouro)	6.21	36.75	No				68	data	5
Baphia nitida	Okoue	3.97	16	No				69	data	5
Theobroma cacao	Cocoa	3.56	16	No				70	data	5
Theobroma cacao	Cocoa	4.09	15	No				71	data	5
Theobroma cacao	Cocoa	4.87	51	No				72	data	5
Theobroma cacao	Cocoa	4.12	32.5	Tapinanthus belvisii				73	data	5
Elaeis guineensis	Palm	3.07	12	No				74	data	5
Theobroma cacao	Cacao	3.41	28.5	Lichens and tapinanthus belvissii				75	data	6
Anarcadium occidentale	Cashew	3.27	22	No				76	data	6
Theobroma cacao	Cocoa	5.55	27.5	Lichens				77	data	6
Anarcadium occidentale	Cashew	4.23	15	No				78	data	6
Theobroma cacao	Cocoa	4.28	34.16	No				79	data	6
Theobroma cacao	Cocoa	4.45	14.5	Lichens				80	data	6
Theobroma cacao	Cocoa	4.2	20.07	No				81	data	6
Theobroma cacao	Cocoa	3.1	15.33	No				82	data	6
Theobroma cacao	Cocoa	3.41	10.75	No				83	data	6
Theobroma cacao	Cocoa	4.15	31.65	No				84	data	6
Theobroma cacao	Cocoa	4.25	24	No				85	data	6
Theobroma caca	Cocoa	3.15	17.5	Lichens				86	data	6
Coffea canephora	Coffee	3.98	13.66	No				87	data	6
Elaeis guineensis	Palm	4.71	217	No				88	data	6
Anarcadium occidentale	Cashew	5.31	20.3	No				89	data	6
Elaeis guineensis	Palm	3.22	287.5	No				90	data	6
Theobroma cacao	Cocoa	4.3	19.5	No				91	data	7
Anarcadium occidentale	Cashew	4.8	36	No				92	data	7
Persea americana	Avocat	9.46	94	No				93	data	7
Persea americana	Avocat	7.78	47.5	No				94	data	7
Coffea canephora	Coffee	4.31	10.5	No				95	data	7
Coffea canephora	Café	4.09	7	No				96	data	7
Theobroma cacao	Cacao	5.56	34.5	No				97	data	7
Theobroma cacao	Cacao	5.79	44.5	No				98	data	7
Theobroma cacao	Cacao	4.67	28.35	No				99	data	7
Theobroma cacao	Cac	4.46	31.7	No				100	data	7
Coffea canephora	Coffee	4.12	12.5	No				101	data	7
Coffea canephora	Coffea	3.86	6.83	No				102	data	7
Coffea canephora	Coffee	4.21	6.66	No				103	data	7
Theobroma cacao	Cocoa	5.36	46.7	Dry branchs				104	data	7
Theobroma cacao	Cocoa	5.97	37.5	Dry branchs				105	data	7
Theobroma cacao	Cocoa	4.45	48.75	No				106	data	7
Coffea canephora	Coffee	3.98	9.5	No				107	data	7
Theobroma cacao	Cacao	4.46	23.5	No				108	data	7
Coffea canephora	Coffea	4.35	12.25	No				109	data	7
Theobroma cacao	Cacao	5.94	29.16	Dry Branchs				110	data	7
Anarcadium occidentale	Cashew	4.58	31.25	No				111	data	7
Theobroma cacao	Cacao	4.93	13.7	No				112	data	7
Theobroma cacao	Cacao	4.89	31	No				113	data	7
Theobroma cacao	Cacao	5.87	36.83	Dry branchs				114	data	7
Coffea canephora	Coffee	4.71	11.5	No				115	data	7
Ficus exasperata	Yengle baoule	3.78	6.09	No				116	data	7
Anarcadium occidentale	Cashew	4.65	17	No				117	data	7
Theobroma cacao	Cocoa	5.97	17.33	Dry branchs				118	data	7
Theobroma cacao	Cacao	4.13	33	Dry branchs				119	data	7
Theobroma cacao	Cocoa	4.46	19.67	No				120	data	7
Theobroma cacao	Cocoa	5.11	45.5	No				121	data	7
Theobroma cacao	Cocoa	5.31	43.2	No				122	data	7
Theobroma cacao	Cocoa	4.78	27.5	Dry branchs				123	data	7
Theobroma cacao	Cocoa tree	10.4	48	Cocoa tree has some beans and mouss on the stem				124	data	8
Theobroma cacao	Cocoa tree	6.91	40	None				125	data	8
Theobroma cacao	Cocoa tree	9.18	55	None				126	data	8
Theobroma cacao	Cocoa tree	7.64	46	None				127	data	8
Theobroma cacao	Cocoa tree	7.88	38.5	None				128	data	8
Theobroma cacao	Cocoa tree	4.9	46	None				129	data	8
Theobroma cacao	Cocoa tree	9.33	42	None				130	data	8
Theobroma cacao	Cocoa tree	8.24	34	None				131	data	8
Theobroma cacao	Cocoa tree	4.83	21	None				132	data	8
Theobroma cacao	Cocoa tree	9.27	35	None				133	data	8
Theobroma cacao	Cocoa tree	4.7	33	None				134	data	8
Theobroma cacao	Cocoa tree	4.5	29	None				135	data	8
Theobroma cacao	Cocoa tree	8.35	31	None				136	data	8
Theobroma cacao	Cocoa tree	4.21	60.5	None				137	data	8
Theobroma cacao	Cocoa tree	12.4	61	None				138	data	8
Theobroma cacao	Cocoa tree	8.6	54	None				139	data	8
Theobroma cacao	Cocoa tree	11.07	58	None				140	data	8
Theobroma cacao	Cocoa tree	12.3	58	None				141	data	8
Theobroma cacao	Cocoa tree	6.3	25	None				142	data	8
Theobroma cacao	Cocoa tree	9.6	34	None				143	data	8
Theobroma cacao	Cocoa tree	8.9	72	None				144	data	8
Theobroma cacao	Cocoa tree	9.4	65	None				145	data	8
Theobroma cacao	Cocoa tree	8.7	71	None				146	data	8
Theobroma cacao	Cocoa tree	9.2	65	None				147	data	8
Theobroma cacao	Cocoa tree	5.6	66	None				148	data	8
Theobroma cacao	Cocoa tree	7.8	51	None				149	data	8
Theobroma cacao	Cocoa tree	8.4	59	None				150	data	8
Theobroma cacao	Cocoa tree	6.3	32	None				151	data	8
Theobroma cacao	Cocoa tree	12.4	41	None				152	data	8
Theobroma cacao	Cocoa tree	7.4	39	None				153	data	8
Theobroma cacao	Cocoa tree	5.3	43	None				154	data	8
Theobroma cacao	Cocoa tree	13.8	48	None				155	data	8
Theobroma cacao	Cocoa tree	5.6	28	None				156	data	8
Theobroma cacao	Cocoa tree	10.4	52	None				157	data	8
Theobroma cacao	Cocoa tree	7.08	29	None				158	data	8
Theobroma cacao	Cocoa tree	9.7	86	Présence of loranthus sp				159	data	8
Theobroma cacao	Cocoa tree	8.32	44	None				160	data	8
Theobroma cacao	Cocoa tree	8.77	44	None				161	data	8
Theobroma cacao	Cocoa tree	7.56	36	None				162	data	8
Theobroma cacao	Cocoa tree	6.37	33	None				163	data	8
Theobroma cacao	Cocoa tree	8.84	53	None				164	data	8
Theobroma cacao	Cocoa tree	9.74	71	None				165	data	8
Theobroma cacao	Cocoa tree	7.36	54	None				166	data	8
Theobroma cacao	Cocoa tree	8.52	63	None				167	data	8
Theobroma cacao	Cocoa tree	7.46	51	None				168	data	8
Theobroma cacao	Cocoa tree	8.06	49	None				169	data	8
Theobroma cacao	Cocoa tree	7.34	48	None				170	data	8
Theobroma cacao	Cocoa tree	6.64	35	None				171	data	8
Theobroma cacao	Cocoa tree	8.73	53	None				172	data	8
Theobroma cacao	Cocoa tree	7.15	48	None				173	data	8
Theobroma cacao	Cocoa tree	8.28	53	None				174	data	8
Theobroma cacao	Cocoa tree	9.35	57	None				175	data	8
Theobroma cacao	Cocoa tree	5.84	38	None				176	data	8
Theobroma cacao	Cocoa tree	6.37	41	None				177	data	8
Theobroma cacao	Cocoa tree	8.9	62	None				178	data	8
Theobroma cacao	Cocoa tree	6.77	40	None				179	data	8
Theobroma cacao	Cocoa tree	6.32	29	None				180	data	8
Theobroma cacao	Cocoa tree	7.14	42	None				181	data	8
Theobroma cacao	Cocoa tree	11.06	58	None				182	data	9
Theobroma cacao	Cocoa tree	4.19	42	None				183	data	9
Theobroma cacao	Cocoa tree	8.73	42	None				184	data	9
Theobroma cacao	Cocoa tree	9.43	53	None				185	data	9
Theobroma cacao	Cocoa tree	7.42	41	None				186	data	9
Theobroma cacao	Cocoa tree	5.81	38	None				187	data	9
Theobroma cacao	Cocoa tree	8.37	63	None				188	data	9
Theobroma cacao	Cocoa tree	6.03	42	None				189	data	9
Theobroma cacao	Cocoa tree	8.86	46	None				190	data	9
Theobroma cacao	Cocoa tree	9.34	49	None				191	data	9
Theobroma cacao	Cocoa tree	8.71	53	None				192	data	9
Acacia mangium	Acacia	7.6	47	None				193	data	9
Theobroma cacao	Cocoa tree	7.8	61	None				194	data	9
Theobroma cacao	Cocoa tree	6.84	46	None				195	data	9
Theobroma cacao	Cocoa tree	8.35	48	None				196	data	9
Theobroma cacao	Cocoa tree	8.14	43	None				197	data	9
Theobroma cacao	Cocoa tree	7.93	39	Cocoa tree				198	data	9
Theobroma cacao	Cocoa tree	9.72	48	None				199	data	9
Theobroma cacao	Cocoa tree	11.38	72	None				200	data	9
Theobroma cacao	Cocoa tree	9.11	46	None				201	data	9
Theobroma cacao	Cocoa tree	9.83	47	None				202	data	9
Theobroma cacao	Cocoa tree	8.31	41	None				203	data	9
Theobroma cacao	Cocoa tree	10.3	55	None				204	data	9
Theobroma cacao	Cocoa tree	9.6	43	None				205	data	9
Theobroma cacao	Cocoa tree	7.52	46	None				206	data	9
Theobroma cacao	Cocoa tree	11.4	75	None				207	data	9
Theobroma cacao	Cocoa tree	12.28	61	None				208	data	9
Theobroma cacao	Cocoa tree	9.36	47	None				209	data	9
Theobroma cacao	Cocoa tree	8.27	49	None				210	data	9
Theobroma cacao	Cocoa tree	8.73	44	None				211	data	9
Theobroma cacao	Cocoa tree	11.03	67	None				212	data	9
Theobroma cacao	Cocoa tree	9.3	54	None				213	data	9
Theobroma cacao	Cocoa tree	8.1	40	None				214	data	9
Theobroma cacao	Cocoa tree	8.73	51	None				215	data	9
Theobroma cacao	Cocoa tree	8.4	45	None				216	data	9
Theobroma cacao	Cocoa tree	9.24	61	None				217	data	9
Theobroma cacao	Cocoa tree	8.3	54	None				218	data	9
Theobroma cacao	Cocoa tree	7.96	51	None				219	data	9
Theobroma cacao	Cocoa tree	7.52	47	None				220	data	9
Theobroma cacao	Cocoa tree	9.17	58	None				221	data	9
Theobroma cacao	Cocoa tree	7.11	39	None				222	data	9
Theobroma cacao	Cocoa tree	8.74	54	None				223	data	9
Theobroma cacao	Cocoa tree	10.78	46	None				224	data	9
Theobroma cacao	Cocoa tree	7.39	56	None				225	data	9
Theobroma cacao	Cocoa tree	8.18	45	Mosses				226	data	9
Theobroma cacao	Cocoa tree	7.51	38	Mosses				227	data	9
Theobroma cacao	Cocoa tree	8.22	46	Mosses				228	data	9
Theobroma cacao	Cocoa tree	7.78	42	Mosses				229	data	9
Theobroma cacao	Cocoa tree	8.27	39	None				230	data	9
Theobroma cacao	Cocoa tree	8.71	42	None				231	data	9
Theobroma cacao	Cocoa tree	7.94	44	None				232	data	9
Theobroma cacao	Cocoa tree	8.19	52	Mosses				233	data	9
Theobroma cacao	Cocoa tree	6.37	39	Mosses				234	data	9
Theobroma cacao	Cocoa tree	7.48	63	None				235	data	10
Theobroma cacao	Cocoa tree	6.92	76	None				236	data	10
Citrus sinensis	Orange tree	8.24	26	None				237	data	10
Theobroma cacao	Cocoa tree	7.83	44	None				238	data	10
Theobroma cacao	Cocoa tree	7.73	50	None				239	data	10
Theobroma cacao	Cocoa tree	8.37	64	None				240	data	10
Theobroma cacao	Cocoa tree	7.44	58	None				241	data	10
Theobroma cacao	Cocoa tree	6.06	51	None				242	data	10
Theobroma cacao	Cocoa tree	4.31	19	None				243	data	10
Theobroma cacao	Cocoa tree	9.2	67	None				244	data	10
Theobroma cacao	Cocoa tree	7.28	45	None				245	data	10
Citrus sinensis	Orange tree	8.77	34	None				246	data	10
Theobroma cacao	Cocoa tree	6.4	43	None				247	data	10
Theobroma cacao	Cocoa tree	7.84	81	None				248	data	10
Theobroma cacao	Cocoa tree	8.36	79	None				249	data	10
Theobroma cacao	Cocoa tree	6.97	33	None				250	data	10
Theobroma cacao	Cocoa tree	4.36	21	None				251	data	10
Theobroma cacao	Cocoa tree	3.43	18	None				252	data	10
Theobroma cacao	Cocoa tree	13.27	85	None				253	data	10
Theobroma cacao	Cocoa tree	3.8	45	None				254	data	10
Theobroma cacao	Cocoa tree	7.38	53	None				255	data	10
Theobroma cacao	Cocoa tree	8.78	53	None				256	data	10
Theobroma cacao	Cocoa tree	7.24	55	None				257	data	10
Theobroma cacao	Cocoa tree	8.46	57	None				258	data	10
Theobroma cacao	Cocoa tree	7.53	37	None				259	data	10
Theobroma cacao	Cocoa tree	7.6	51	None				260	data	10
Theobroma cacao	Cocoa tree	8.31	46	None				261	data	10
Theobroma cacao	Cocoa tree	7.18	42	None				262	data	10
Theobroma cacao	Cocoa tree	5.7	46	None				263	data	10
Theobroma cacao	Cocoa tree	7.08	36	None				264	data	10
Theobroma cacao	Cocoa tree	8.35	67	None				265	data	10
Theobroma cacao	Cocoa tree	7.23	39	None				266	data	10
Theobroma cacao	Cocoa tree	8.79	61	None				267	data	10
Theobroma cacao	Cocoa tree	5.8	41	None				268	data	10
Theobroma cacao	Cocoa tree	8.46	79	None				269	data	10
Theobroma cacao	Cocoa tree	9.34	56	None				270	data	10
Theobroma cacao	Cocoa tree	8.94	52	None				271	data	10
Theobroma cacao	Cocoa tree	8.43	55	None				272	data	10
Theobroma cacao	Cocoa tree	6.94	43	None				273	data	10
Theobroma cacao	Cocoa tree	9.34	55	None				274	data	10
Theobroma cacao	Cocoa tree	7.74	57	None				275	data	10
Theobroma cacao	Cocoa tree	7.61	47	None				276	data	10
Theobroma cacao	Cocoa tree	8.57	62	None				277	data	10
Theobroma cacao	Cocoa tree	8.66	47	None				278	data	10
Theobroma cacao	Cocoa tree	8.39	48	None				279	data	10
Theobroma cacao	Cocoa tree	7.6	39	None				280	data	10
Theobroma cacao	Cocoa tree	7.65	43	None				281	data	10
Theobroma cacao	Cocoa tree	8.52	53	None				282	data	10
Theobroma cacao	Cocoa tree	7.4	43	None				283	data	11
Theobroma cacao	Cocoa tree	4.98	38	None				284	data	11
Theobroma cacao	Cocoa tree	3.39	57	Cocoa tree regenerated				285	data	11
Theobroma cacao	Cocoa tree	6.43	88	Old cocoa tree				286	data	11
Theobroma cacao	Cocoa tree	5.6	36	Cocoa tree in regeneration				287	data	11
Theobroma cacao	Cocoa tree	7.26	29	Presence of mosses on the cocoa tree				288	data	11
Theobroma cacao	Cocoa tree	4.8	23	None				289	data	11
Theobroma cacao	Cocoa tree	4.22	48	None				290	data	11
Theobroma cacao	Cocoa tree	8.37	81	None				291	data	11
Theobroma cacao	Cocoa tree	6.84	49	None				292	data	11
Theobroma cacao	Cocoa tree	8.37	42	None				293	data	11
Theobroma cacao	Cocoa tree	4.48	30	Mosses on the tree				294	data	11
Theobroma cacao	Cocoa tree	5.36	35	Mosses				295	data	11
Theobroma cacao	Cocoa tree	5.4	32	Mosses				296	data	11
Theobroma cacao	Cocoa tree	4.41	33.66	Mosses				297	data	11
Theobroma cacao	Cocoa tree	4.74	36	Mosses				298	data	11
Theobroma cacao	Cocoa tree	9.32	88	None				299	data	11
Theobroma cacao	Cocoa tree	4.28	43	None				300	data	11
Theobroma cacao	Cocoa tree	3.18	19	Old tree				301	data	11
Theobroma cacao	Cocoa tree	5.82	31	Mosses				302	data	11
Theobroma cacao	Cocoa tree	6.37	74	Presence of beans				303	data	11
Psidium gujava	Goyava tree	5.02	12.81	None				304	data	11
Theobroma cacao	Cocoa tree	4.58	37	Mosses				305	data	11
Elaeis guineensis	Palm tree	8.66	193	None				306	data	11
Theobroma cacao	Cocoa tree	3.35	46	Mosses and old tree				307	data	11
Theobroma cacao	Cocoa tree	4.36	38	Mosses				308	data	11
Theobroma cacao	Cocoa tree	6.15	53	None				309	data	11
Theobroma cacao	Cocoa tree	6.82	46	Mosses				310	data	11
Theobroma cacao	Cocoa tree	3.78	24.5	Mosses				311	data	11
Theobroma cacao	Cocoa tree	4.04	17	Mosses				312	data	11
Cocos nucifera	Coconut tree	4.23	30	Young tree				313	data	11
Theobroma cacao	Cocoa tree	4.78	36	Mosses				314	data	11
Theobroma cacao	Cocoa tree	6.63	37	Mosses				315	data	11
Theobroma cacao	Cocoa tree	5.27	40	Mosses				316	data	11
Theobroma cacao	Cocoa tree	4.72	35	Mosses				317	data	11
Theobroma cacao	Cocoa tree	3.84	37	Mosses				318	data	11
Theobroma cacao	Cocoa tree	5.33	36	Mosses				319	data	11
Theobroma cacao	Cocoa tree	6.13	41	Mosses				320	data	11
Theobroma cacao	Cocoa tree	4.3	38	Mosses				321	data	11
Theobroma cacao	Cocoa tree	4.57	39	Mosses				322	data	11
Theobroma cacao	Cocoa tree	5.38	41	Mosses				323	data	11
Theobroma cacao	Cocoa tree	4.87	44	Mosses				324	data	11
Theobroma cacao	Cocoa tree	6.37	42	Mosses				325	data	11
Theobroma cacao	Cocoa tree	5.46	42	Theobroma cacao				326	data	11
Theobroma cacao	Cocoa tree	3.7	14	None				327	data	12
Theobroma cacao	Cocoa tree	3.26	16.5	None				328	data	12
Theobroma cacao	Cocoa tree	3.84	25	Old tree regenerated				329	data	12
Theobroma cacao	Cocoa tree	5.03	24	None				330	data	12
Theobroma cacao	Cocoa tree	5.37	27	None				331	data	12
Theobroma cacao	Cocoa tree	5.94	25	None				332	data	12
Theobroma cacao	Cocoa tree	8.11	34	None				333	data	12
Persea americana	Avocado tree	9.96	50	None				334	data	12
Theobroma cacao	Cocoa tree	5.8	36.5	None				335	data	12
Theobroma cacao	Cocoa tree	7.24	41	None				336	data	12
Theobroma cacao	Cocoa tree	7.15	43	None				337	data	12
Theobroma cacao	Cocoa tree	6.4	29.5	None				338	data	12
Theobroma cacao	Cocoa tree	5.46	41	None				339	data	12
Theobroma cacao	Cocoa tree	5.62	31	None				340	data	12
Theobroma cacao	Cocoa tree	5.26	34.5	None				341	data	12
Theobroma cacao	Cocoa tree	3.37	12	Young tree				342	data	12
Theobroma cacao	Cocoa tree	7.47	27	None				343	data	12
Theobroma cacao	Cocoa tree	6.71	33	Mosses				344	data	12
Theobroma cacao	Cocoa tree	4.87	38	Mosses				345	data	12
Theobroma cacao	Cocoa tree	4.31	44	Mosses				346	data	12
Theobroma cacao	Cocoa tree	8.57	56	Mosses				347	data	12
Theobroma cacao	Cocoa tree	4.16	23	Old tree regenerated				348	data	12
Theobroma cacao	Cocoa tree	6.85	83	Mosses				349	data	12
Theobroma cacao	Cocoa tree	5.28	33	Mosses				350	data	12
Theobroma cacao	Cocoa tree	4.7	42	Mosses				351	data	12
Theobroma cacao	Cocoa tree	6.04	38	Mosses				352	data	12
Theobroma cacao	Cocoa tree	7.71	48	Mosses				353	data	12
Theobroma cacao	Cocoa tree	4.79	46	Mosses				354	data	12
Theobroma cacao	Cocoa tree	5.6	36	Mosses				355	data	12
Theobroma cacao	Cocoa tree	7.08	39.66	Mosses				356	data	12
Theobroma cacao	Cocoa tree	5.24	35	Mosses				357	data	12
Theobroma cacao	Cocoa tree	4.9	36	Mosses				358	data	12
Theobroma cacao	Cocoa tree	4.84	40	Mosses				359	data	12
Theobroma cacao	Cocoa tree	5.7	38	Mosses				360	data	12
Theobroma cacao	Cocoa tree	4.76	39.5	Mosses				361	data	12
Theobroma cacao	Cocoa tree	3.59	37	Mosses				362	data	12
Theobroma cacao	Cocoa tree	4.83	43	None				363	data	13
Theobroma cacao	Cocoa tree	4.18	39	Mosses				364	data	13
Theobroma cacao	Cocoa tree	4.2	22	None				365	data	13
Theobroma cacao	Cocoa tree	5.89	53	None				366	data	13
Theobroma cacao	Cocoa tree	5.72	41	None				367	data	13
Theobroma cacao	Cocoa tree	5.16	25	None				368	data	13
Theobroma cacao	Cocoa tree	5.07	49	Mosses				369	data	13
Theobroma cacao	Cocoa tree	3.37	52	None				370	data	13
Theobroma cacao	Cocoa tree	4.94	42	Mosses				371	data	13
Theobroma cacao	Cocoa tree	3.86	33	Mosses				372	data	13
Theobroma cacao	Cocoa tree	5.78	45.75	Mosses				373	data	13
Theobroma cacao	Cocoa tree	6.43	61	Mosses				374	data	13
Theobroma cacao	Cocoa tree	7.02	48	Mosses				375	data	13
Theobroma cacao	Cocoa tree	4.21	19	None				376	data	13
Theobroma cacao	Cocoa tree	6.13	34	Mosses				377	data	13
Theobroma cacao	Cocoa tree	4.35	39	Mosses				378	data	13
Theobroma cacao	Cocoa tree	3.8	42	Mosses				379	data	13
Theobroma cacao	Cocoa tree	6.28	41	None				380	data	13
Theobroma cacao	Cocoa tree	4.32	38	None				381	data	13
Theobroma cacao	Cocoa tree	4.34	41	None				382	data	13
Theobroma cacao	Cocoa tree	3.89	35	Mosses				383	data	13
Theobroma cacao	Cocoa tree	5.4	36	Mosses				384	data	13
Theobroma cacao	Cocoa tree	5.67	52	Mosses				385	data	13
Theobroma cacao	Cocoa tree	7.32	47	Mosses				386	data	13
Theobroma cacao	Cocoa tree	7.27	38	Mosses				387	data	13
Theobroma cacao	Cocoa tree	3.54	38	Mosses				388	data	13
Theobroma cacao	Cocoa tree	8.25	62	Mosses				389	data	13
Citrus sinensis	Orange tree	7.14	18	None				390	data	13
Theobroma cacao	Cocoa tree	3.28	34	Mosses				391	data	13
Theobroma cacao	Cocoa tree	4.15	39	Mosses				392	data	13
Theobroma cacao	Cocoa tree	4.67	45	Mosses				393	data	13
Theobroma cacao	Cocoa tree	5.6	45	Mosses				394	data	13
Theobroma cacao	Cocoa tree	6.81	52	Mosses				395	data	13
Theobroma cacao	Cocoa tree	5.3	33	Mosses				396	data	13
Theobroma cacao	Cocoa tree	5.65	41	Mosses				397	data	13
Theobroma cacao	Cocoa tree	6.13	45	Mosses				398	data	13
Theobroma cacao	Cocoa tree	5.87	43	Mosses				399	data	13
Theobroma cacao	Cocoa tree	5.62	41	Mosses				400	data	13
Theobroma cacao	Cocoa tree	4.85	41	Mosses				401	data	13
Theobroma cacao	Cocoa tree	5.3	39	Mosses				402	data	13
Theobroma cacao	Cocoa tree	5.7	46.33	Mosses				403	data	13
Theobroma cacao	Cocoa tree	6.8	40	Mosses				404	data	13
Theobroma cocoa	Cacao	8.9	56	No				405	data	14
Theobroma cocoa	Caca	6.2	45	No				406	data	14
Theobroma cocoa	Cacao	10.85	68	No				407	data	14
Theobroma cocoa	Cacao	8.23	49	No				408	data	14
Theobroma cocoa	Cacao	7.52	62	No				409	data	14
Theobroma cocoa	Cacao	7.06	62	No				410	data	14
Theobroma cocoa	Cacao	6.21	59	No				411	data	14
Theobroma cocoa	Cacao	9.57	58	No				412	data	14
Theobroma cocoa	Cacao	7.84	49	No				413	data	14
Theobroma cocoa	Cacao	9.15	57	No				414	data	14
Theobroma cocoa	Cacao	8.5	57	No				415	data	14
Theobroma cocoa	Cacao	7.09	62	No				416	data	14
Theobroma cocoa	Cacao	8.21	49	No				417	data	14
Theobroma cocoa	Cacao	6.53	58	No				418	data	14
Theobroma cocoa	Cacao	7.14	61	None				419	data	14
Theobroma cocoa	Cacao	8.56	65	No				420	data	14
Theobroma cocoa	Cacao	6.38	56	No				421	data	14
Theobroma cocoa	Cacao	7.9	58	No				422	data	14
Theobroma cocoa	Cacao	7.98	53	No				423	data	14
Theobroma cocoa	Cacao	7.5	49	No				424	data	14
Theobroma cocoa	Cacao	7.3	38	No				425	data	14
Theobroma cocoa	Cacao	6.15	53	No				426	data	14
Theobroma cocoa	Cacao	11.7	57	N0				427	data	14
Theobroma cocoa	Cacao	10.65	64	No				428	data	14
Theobroma cocoa	Cacao	6.84	53	No				429	data	14
Theobroma cocoa	Cacao	7.91	57	No				430	data	14
Theobroma cocoa	Cacao	7.6	65	No				431	data	14
Theobroma cocoa	Cacao	6.21	49	No				432	data	14
Theobroma cocoa	Cacao	6.12	41	No				433	data	14
Theobroma cocoa	Cacao	7.5	68	No				434	data	14
Theobroma cocoa	Cocoa	6.41	61	No				435	data	14
Theobroma cocoa	Cacao	5.78	29	No				436	data	14
Theobroma cocoa	Cacao	4.76	31	No				437	data	14
Theobroma cocoa	Cacao	7.8	67	No				438	data	14
Theobroma cocoa	Cacao	6.41	49	No				439	data	14
Theobroma cocoa	Cacao	6.74	33	No				440	data	14
Theobroma cocoa	Cacao	6.18	34	No				441	data	14
Theobroma cocoa	Cacao	7.48	57	No				442	data	14
Theobroma cocoa	Cacao	7.1	43	No				443	data	14
Theobroma cocoa	Cacao	5.8	27	No				444	data	14
Theobroma cocoa	Cacao	6.3	57	No				445	data	14
Theobroma cocoa	Cacao	5.21	59	No				446	data	14
Theobroma cocoa	Cacao	5.8	28	No				447	data	14
Theobroma cocoa	Caca	6.8	54	No				448	data	14
Theobroma cocoa	Cacao	6.8	57	No				449	data	14
Theobroma cocoa	Cacao	7.5	68	No				450	data	14
Theobroma cocoa	Cacao	7.6	37	No				451	data	14
Theobroma cocoa	Caca	5.13	58	No				452	data	14
Theobroma cocoa	Cacao	7.3	49	No				453	data	14
Theobroma cocoa	Cacao	7.94	68	Non				454	data	14
Anacardium occitentale	N0	11.12	53	No				455	data	14
Coffee canefire	Cafe	7.52	52	No				456	data	14
Anacardium occidentalle Tal	anarcade	9	723	No				457	data	14
Theobroma cocoa	Caca	7.5	59	No				458	data	14
Theobroma cocoa	Cacao	5.86	44	No				459	data	14
Theobroma cocoa	Cacao	5.74	48	No				460	data	14
Theobroma cocoa	Cacao	5.9	27	No				461	data	14
Theobroma cocoa	Cacao	6.12	45	No				462	data	14
Anacardium occidentale	À accédez	9	43	No				463	data	14
Theobroma cocoa	Cacao	5.95	40	No				464	data	15
Theobroma cocoa	Cacao	6.25	39	No				465	data	15
Theobroma cocoa	Cocoa	5.34	41	No				466	data	15
Theobroma cocoa	Cacao	6.27	45	No				467	data	15
Theobroma cocoa	Cacao	6.28	47	No				468	data	15
Theobroma cocoa	Cacao	5.79	37	No				469	data	15
Theobroma cocoa	Cacao	5.47	38	No				470	data	15
Theobroma cocoa	Cacao	4.97	31	No				471	data	15
Theobroma cocoa	Cacao	5.63	42	No				472	data	15
Theobroma cocoa	Cacao	5.62	58	No				473	data	15
Theobroma cocoa	cocoa	5.21	42	No				474	data	15
Theobroma cocoa	Cacao	6.23	58	No				475	data	15
Theobroma cocoa	Cacao	6.12	39	No				476	data	15
Theobroma cocoa	Cacao	4.75	36	No				477	data	15
Theobroma cocoa	Cacao	5.41	41	No				478	data	15
Theobroma cocoa	Cacao	6.02	61	No				479	data	15
Theobroma cocoa	Cacao	5.28	47	No				480	data	15
Theobroma cocoa	Cacao	5.68	52	No				481	data	15
Theobroma cocoa	Cacao	5.27	49	No				482	data	15
Theobroma cocoa	Cacao	5.2	41	No				483	data	15
Theobroma cocoa	Cacao	6.08	59	No				484	data	15
Theobroma cocoa	Cacao	4.79	43	No				485	data	15
Theobroma cocoa	Cacao	5.08	49	No				486	data	15
Theobroma cocoa	Cacao	4.75	41	No				487	data	15
Theobroma cocoa	Cacao	5.68	47	No				488	data	15
Theobroma cocoa	Cacao	4.76	48	No				489	data	15
Theobroma cocoa	Cacao	5.27	49	No				490	data	15
Theobroma cocoa	Cacao	5.23	47	No				491	data	15
Theobroma cocoa	Cacao	7.01	57	No				492	data	15
Theobroma cocoa	Cacao	6.02	57	No				493	data	15
Theobroma cocoa	Cacao	5.2	49	No				494	data	15
Theobroma cocoa	Cacao	5.88	42	No				495	data	15
Theobroma cocoa	Cacao	4.86	47	No				496	data	15
Theobroma cocoa	Cacao	5.47	40	No				497	data	15
Theobroma cocoa	Cacao	5.71	59	No				498	data	15
Theobroma cocoa	Cacao	5.2	42	No				499	data	15
Theobroma cocoa	Cacao	4.42	38	No				500	data	15
Theobroma cocoa	Cacao	475	32	No				501	data	15
Theobroma cocoa	Cacao	4.36	34	No				502	data	15
Theobroma cocoa	Cacao	5.57	51	No				503	data	15
Theobroma cocoa	Cacao	5.41	47	No				504	data	15
Theobroma cocoa	Cacao	6.2	46	No				505	data	15
Theobroma cocoa	Cacao	5.14	49	No				506	data	15
Theobroma cocoa	Cacao	5.74	46	No				507	data	15
Theobroma cocoa	Cacao	4.59	57	No				508	data	15
Theobroma cocoa	No	5.21	41	No				509	data	15
Theobroma cocoa	Cacao	6.1	47	No				510	data	15
Theobroma cocoa	Cacao	4.79	37	No				511	data	15
Theobroma cocoa	Cacao	4.21	42	No				512	data	15
Theobroma cocoa	Cacao	5.12	49	No				513	data	15
Theobroma cocoa	Cacao	4.23	39	No				514	data	15
Theobroma cocoa	Cacao	4.57	41	No				515	data	15
Theobroma cocoa	Cacao	5.01	47	No				516	data	15
Theobroma cocoa	Cacao	5.13	49	No				517	data	15
Theobroma cocoa	Cacao	5.03	49	No				518	data	15
Theobroma cocoa	Cacao	6.3	51	No				519	data	15
Theobroma cocoa	Cacao	5.88	49	No				520	data	15
Theobroma cocoa	Cacao	4.59	41	No				521	data	15
Theobroma cocoa	Cacao	5.73	47	No				522	data	15
Theobroma cocoa	Cacao	4.72	39	No				523	data	15
Theobroma cocoa	Cacao	5.76	40	No				524	data	15
Theobroma cocoa	Cacao	5.3	42	No				525	data	15
Theobroma cocoa	Cacao	5.03	39	No				526	data	15
Theobroma cocoa	Cacao	5.21	57	No				527	data	15
Theobroma cocoa	Cacao	5.26	49	No				528	data	15
Theobroma cocoa	Cacao	5.21	51	No				529	data	15
Theobroma cocoa	Cacao	4.73	48	No				530	data	15
Theobroma cocoa	Cacao	4.75	48	No				531	data	15
Theobroma cocoa	Cacao	5.23	47	No				532	data	15
Theobroma cocoa	Cacao	4.76	50	No				533	data	15
Theobroma cocoa	Cacao	5.17	57	No				534	data	15
Theobroma cocoa	Cacao	4.69	47	No				535	data	15
Malnikaria multinervis	No	7.53	72	No				536	data	16
Celtis milbraedi	Ba	22.13	89	No				537	data	16
Calamus deeratus	No	9.42	72	Faux palmier				538	data	16
Newbouldia leavis	Isope	14.25	38	No				539	data	16
Xylopia aethiopica	Canifii(djoula)	8.51	31	No				540	data	16
Theobroma cocoa	Cacao	7.23	34	No				541	data	16
Theobroma cocoa	Cacao	7.12	33	No				542	data	16
Harungana madacariensis	No	11.23	76	No				543	data	16
Mangifera indica	Manguier	13.52	65	No				544	data	17
Celtis milbaedi	Ba	17.53	100	Perforé				545	data	17
Elaeis guinnensis	Palmier	14.73	230	No				546	data	17
Ficus sur	No	7.63	67	En en repousse				547	data	17
Xylopia aethiopica	Canifii	11.28	41	No				548	data	17
Terminalia superba	Frake	9.73	22	No				549	data	17
Myrianthus arboreus	Tikriti	7.43	64	No				550	data	17
Psidium guyava	Goyave	7.24	18	No				551	data	17
Myrianthus arboreus	No	13.21	74	No				552	data	17
Theobroma cocoa	Cacao	8.23	45	No				553	data	17
Newbouldia leavis	Isope	27.85	47	No				554	data	18
Ceiba pentadra	Fromager	19.42	76	No				555	data	18
Bridelia ferruginea	No	11.27	51	No				556	data	18
Newbouldia leavis	Isope	17.85	49	No				557	data	18
Bridelia ferruginea	No	10.78	41	No				558	data	18
Ficus sur	No	9.41	57	No				559	data	18
Parkia biglobosa	Nere	17.23	68	No				560	data	18
Anacardium occidentale	Anacarde	9.52	59	No				561	data	18
Anacardium occidentale	Anacardium occidentale	10.32	72	No				562	data	18
Trema orientalis	No	7.33	47	No				563	data	18
Coffea canefora	Café	7.21	32	No				564	data	18
Milletia zechiana	No	9.42	51	No				565	data	18
Theobroma cocoa	Cacao	8.12	34	No				566	data	18
Theobroma cocoa	Cacao	9.53	64	No				567	data	18
Theobroma cocoa	Cacao	9.15	57	No				568	data	18
Theobroma cocoa	Cacao	9.86	46	No				569	data	19
Theobroma cocoa	Cacao	8.53	41	No				570	data	19
Theobroma cocoa	Cacao	7.42	45	No				571	data	19
Theobroma cocoa	Cacao	8.52	41	No				572	data	19
Theobroma cocoa	Caca	9.85	52	No				573	data	19
Theobroma cocoa	Cacao	8.75	51	No				574	data	19
Theobroma cocoa	Cacao	7.53	43	No				575	data	19
Theobroma cocoa	Caca	9.83	49	No				576	data	19
Theobroma cocoa	Cacao	7.42	61	No				577	data	19
Theobroma cocoa	Caca	6.53	41	No				578	data	19
Theobroma cocoa	Cacao	7.59	62	No				579	data	19
Theobroma cocoa	Cacao	9.52	71	No				580	data	19
Theobroma cocoa	Cacao	9.25	49	No				581	data	19
Theobroma cocoa	Cacao	9.15	53	No				582	data	19
Theobroma cocoa	Cacao	10.17	48	No				583	data	19
Theobroma cocoa	Cocoa	9.14	58	No				584	data	19
Theobroma cocoa	Cacao	10.85	62	No				585	data	19
Theobroma cocoa	Caca	7.42	67	No				586	data	19
Theobroma cocoa	Cacao	9.75	43	No				587	data	19
Theobroma cocoa	Caca	9.52	64	No				588	data	19
Theobroma cocoa	Cacao	8.15	71	No				589	data	19
Theobroma cocoa	Cacao	8.53	59	No				590	data	19
Theobroma cocoa	Cacao	6.85	37	No				591	data	19
Theobroma cocoa	Cacao	7.45	6.23	No				592	data	19
Theobroma cocoa	Cacao	8.42	31	No				593	data	19
Theobroma cocoa	Cacao	7.14	39	No				594	data	19
Theobroma cocoa	Cacao	8.57	37	No				595	data	19
Theobroma cocoa	Caca	4.78	27	No				596	data	19
Theobroma cocoa	Caca	6.95	28	No				597	data	19
Theobroma cocoa	Cacao	4.53	26	No				598	data	19
Theobroma cocoa	Cacao	4.21	19	No				599	data	19
Theobroma cocoa	Cacao	6.52	31	No				600	data	19
Theobroma cocoa	Cacao	9.15	53	No				601	data	19
Theobroma cocoa	Cacao	7.9	52	No				602	data	19
Theobroma cocoa	Cacao	8.53	64	No				603	data	19
Theobroma cocoa	Cacao	8.23	73	No				604	data	19
Theobroma cocoa	Cacao	7.9	59	No				605	data	19
Theobroma cocoa	Cacao	8.53	57	No				606	data	19
Theobroma cocoa	Cacao	9.52	59	No				607	data	19
Theobroma cocoa	Cacao	7.51	67	No				608	data	19
Theobroma cocoa	Cacao	7.53	35	No				609	data	19
Theobroma cocoa	Cacao	8.9	53	No				610	data	19
Theobroma cocoa	Cacao	9.85	67	No				611	data	19
Theobroma cocoa	Cacao	9.45	68	No				612	data	19
Theobroma cocoa	Cacao	7.92	67	No				613	data	19
Theobroma cocoa	Cacao	7.42	53	No				614	data	19
Theobroma cocoa	Cacao	7.12	65	No				615	data	19
Theobroma cocoa	Cacao	8.53	68	No				616	data	19
Theobroma cocoa	Cacao	9.23	76	No				617	data	19
Bombax buenopozense	Kapokier	32.17	194	Big tree				618	data	20
Albizia zygia	No	7.42	29	No				619	data	20
Spomdia mombin	Mirabelier	8.41	17	No				620	data	20
Coffea canephora	Café	8.12	27	No				621	data	20
Coffea canephora	Cafe	9.52	31	No				622	data	20
Coffea canephora	Café	7.42	22	No				623	data	20
Coffea canephora	Café	7.23	21	No				624	data	20
Coffea canephora	Cafe	6.9	37	No				625	data	20
Coffea canephora	Café	6.1	23	No				626	data	20
Coffea canephora	Cafe	5.86	21	No				627	data	20
Coffea canephora	Café	6.44	29	No				628	data	20
Coffea canephora	Café	7.1	35	No				629	data	20
Coffea canephora	Cafe	5.62	24	No				630	data	20
Coffea canephora	Cafe	7.24	23	No				631	data	20
Coffea canephora	Cafe	6.32	31	No				632	data	20
Coffea canephora	Cafe	6.1	52	No				633	data	20
Coffea canephora	Cafe	6.23	35	No				634	data	20
Coffea canephora	Cafe	6.45	29	No				635	data	20
Coffea canephora	Cafe	6.2	41	No				636	data	20
Coffea canephora	Café	6.35	37	No				637	data	20
Coffea canephora	Cafe	4.9	38	No				638	data	20
Coffea canephora	Café	4.9	38	No				639	data	20
Theobroma cocoa	Cacao	11.74	62	No				640	data	20
Theobroma cocoa	Cacao	9.78	54	No				641	data	20
Theobroma cocoa	Cacao	7.91	56	No				642	data	20
Theobroma cocoa	Cacao	8.71	65	No				643	data	20
Theobroma cocoa	Cacao	9.51	53	No				644	data	20
Theobroma cocoa	Cacao	9.42	52	No				645	data	20
Theobroma cocoa	Cacao	11.52	37	No				646	data	20
Theobroma cocoa	Cacao	9.83	87	No				647	data	20
Theobroma cocoa	Cacao	8.12	47	No				648	data	20
Theobroma cocoa	Cacao	7.24	37	No				649	data	20
Theobroma cocoa	Cacao	10.01	51	No				650	data	20
Theobroma cocoa	Cacao	10.21	41	No				651	data	20
Theobroma cocoa	Cacao	8.42	43	No				652	data	20
Theobroma cocoa	Cacao	8.12	48	No				653	data	20
Theobroma cocoa	Cacao	9.07	47	No				654	data	20
Theobroma cocoa	Cacao	11.24	47	No				655	data	20
Theobroma cocoa	Cacao	9.47	41	No				656	data	20
Theobroma cocoa	Cacao	9.52	57	No				657	data	20
Theobroma cocoa	Cacao	8.52	47	No				658	data	20
Theobroma cocoa	Cacao	8.52	47	No				659	data	20
Theobroma cocoa	Cacao	7.56	51	No				660	data	20
Theobroma cocoa	Cacao	8.17	44	No				661	data	20
Theobroma cocoa	Cacao	7.89	45	No				662	data	20
Theobroma cocoa	Cacao	9.02	47	No				663	data	20
Theobroma cocoa	Cacao	7.41	42	No				664	data	20
Theobroma cocoa	Cacao	9.17	54	No				665	data	20
Theobroma cocoa	Cacao	10.24	51	No				666	data	20
Theobroma cocoa	Cacao	10.22	42	No				667	data	20
Theobroma cocoa	Cacao	11.04	45	No				668	data	20
Theobroma cocoa	Cacao	9.74	45	No				669	data	20
Theobroma cocoa	Cacao	7.42	41	No				670	data	20
Theobroma cocoa	Cacao	7.42	51	No				671	data	20
Theobroma cocoa	Cacao	8.72	39	No				672	data	21
Theobroma cocoa	Cacao	11.86	37	No				673	data	21
Theobroma cocoa	Cacao	12.74	47	No				674	data	21
Theobroma cocoa	Cacao	11.53	57	No				675	data	21
Theobroma cocoa	Cacao	9.73	49	No				676	data	21
Theobroma cocoa	Cacao	8.59	39	No				677	data	21
Theobroma cocoa	Cacao	11.23	47	No				678	data	21
Theobroma cocoa	Cacao	13.68	61	No				679	data	21
Theobroma cocoa	Cacao	12.53	53	No				680	data	21
Theobroma cocoa	Cacao	14.03	58	No				681	data	21
Theobroma cocoa	Cacao	9.85	41	No				682	data	21
Theobroma cocoa	Cacao	11.08	48	No				683	data	21
Theobroma cocoa	Cacao	12.07	53	No				684	data	21
Theobroma cocoa	Cacao	9.18	43	No				685	data	21
Theobroma cocoa	Cacao	8.49	58	No				686	data	21
Theobroma cocoa	Cacao	7.12	49	No				687	data	21
Theobroma cocoa	Cacao	6.98	32	No				688	data	21
Theobroma cocoa	Cacao	9.85	57	No				689	data	21
Theobroma cocoa	Cacao	9.84	46	No				690	data	21
Theobroma cocoa	Cacao	8.9	59	No				691	data	21
Theobroma cocoa	Cacao	9.41	58	No				692	data	21
Theobroma cocoa	Cacao	10.78	56	No				693	data	21
Theobroma cocoa	Cacao	8.58	49	No				694	data	21
Theobroma cocoa	Cacao	11.58	45	No				695	data	21
Theobroma cocoa	Cacao	11.86	49	No				696	data	21
Theobroma cocoa	Cacao	9.74	56	No				697	data	21
Theobroma cocoa	Cacao	10.95	61	No				698	data	21
Theobroma cocoa	Caca	7.23	37	No				699	data	21
Theobroma cocoa	Cacao	8.52	47	No				700	data	21
Theobroma cocoa	Cocoa	9.82	45	No				701	data	21
Theobroma cocoa	Cacao	11.42	49	No				702	data	21
Theobroma cocoa	Cacao	11.23	53	No				703	data	21
Theobroma cocoa	Cacao	10.52	49	No				704	data	21
Theobroma cocoa	Cacao	10.47	49	No				705	data	21
Theobroma cocoa	Cacao	10.56	52	No				706	data	21
Theobroma cocoa	Cacao	10.74	59	No				707	data	21
Theobroma cocoa	Cacao	10.24	51	No				708	data	21
Theobroma cocoa	Cacao	10.78	59	No				709	data	21
Theobroma cocoa	Cacao	10.58	51	No				710	data	21
Theobroma cocoa	Cacao	9.86	41	No				711	data	21
Theobroma cocoa	Cacao	9.21	40	No				712	data	21
Theobroma cocoa	Cacao	8.58	57	No				713	data	21
Theobroma cocoa	Cacao	11.57	57	No				714	data	21
Theobroma cocoa	Cacao	11.52	49	No				715	data	21
Theobroma cocoa	Cacao	10.56	51	No				716	data	21
Theobroma cocoa	Cacao	9.56	43	No				717	data	21
Theobroma cocoa	Cacao	11.07	43	No				718	data	21
Theobroma cocoa	Cacao	9.75	54	No				719	data	21
Theobroma cocoa	Cacao	11.03	47	No				720	data	21
Theobroma cocoa	Cacao	10.1	42	No				721	data	21
Theobroma cocoa	Cacao	10.75	41	No				722	data	21
Theobroma cocoa	Cacao	10.25	59	No				723	data	21
Theobroma cocoa	Cacao	10.52	51	No				724	data	21
Theobroma cocoa	Cacao	9.04	52	No				725	data	21
Theobroma cocoa	Cacao	9.47	39	No				726	data	21
Theobroma cocoa	Cacao	9.07	57	No				727	data	21
Theobroma cocoa	Cacao	9.47	47	No				728	data	21
Theobroma cocoa	Cacao	9.74	52	No				729	data	21
Theobroma cocoa	Cacao	8.25	45	No				730	data	21
Theobroma cocoa	Cacao	11.47	42	No				731	data	21
Theobroma cocoa	Cacao	11.23	49	No				732	data	21
Theobroma cocoa	Cacao	9.58	56	No				733	data	21
Theobroma cocoa	Cacao	10.74	61	No				734	data	21
Theobroma cocoa	Cacao	10.09	49	Cacao				735	data	21
Theobroma cocoa	Cacao	10.52	52	No				736	data	21
Theobroma cocoa	Cacao	10.61	47	No				737	data	21
Theobroma cocoa	Cacao	10.74	51	No				738	data	21
Theobroma cocoa	Cacao	10.56	48	No				739	data	21
Theobroma cocoa	Cacao	47	53	No				740	data	21
Theobroma cocoa	Cacao	10.52	57	No				741	data	21
Theobroma cocoa	Cacao	10.2	39	No				742	data	21
Theobroma cocoa	Ca	11.52	52	No				743	data	21
Theobroma cocoa	Cacao	9.83	37	No				744	data	21
Rovolphia vomitoria	No	8.65	46	No				745	data	22
Copaifora salikounda	No	13.57	67	No				746	data	22
Theobroma cocoa	Cacao	7.21	27	No				747	data	23
Anacardium occidentale	Anacarde	12.42	39	No				748	data	23
Anacardium occidentale	Anacarde	11.59	37	No				749	data	23
Anacardium occidentale	Anacarde	10.47	45	No				750	data	23
Anacardium occidentale	Anacarde	9.75	64	No				751	data	23
Anacardium occidentale	Anacardium	10.07	56	No				752	data	23
Theobroma cocoa	Cacao	8.14	41	No				753	data	23
Theobroma cocoa	Cacao	9.17	44	No				754	data	23
Theobroma cocoa	Cacao	7.96	45	No				755	data	23
Theobroma cocoa	Cacao	9.75	48	No				756	data	23
Coffea canephora	Café	7.45	31	No				757	data	23
Theobroma cocoa	Cacao	7.69	32	No				758	data	23
Coffea canephora	Café	6.89	32	No				759	data	23
Coffea canephora	Café	6.42	37	No				760	data	23
Coffea canephora	Café	7.52	31	N0				761	data	23
Coffea canephora	Café	6.23	24	No				762	data	23
Coffea canephora	Café	7.23	27	No				763	data	23
Coffea canephora	Café	5.64	31	No				764	data	23
Coffea canephora	Café	6.74	38	No				765	data	23
Coffea canephora	Café	6.97	35	No				766	data	23
Anacardium occidentale	Anacarde	11.47	51	No				767	data	23
Anacardium occidentale	Anacarde	10.47	53	No				768	data	23
Anacardium occidentale	Anacarde	9.78	47	No				769	data	23
Anacardium occidentale	Anacarde	11.72	38	No				770	data	23
Theobroma cocoa	Cacao	8.96	32	No				771	data	23
Theobroma cocoa	Cacao	7.53	28	No				772	data	23
Theobroma cocoa	Cacao	6.87	23	No				773	data	23
Anacardium occidentale	Anacardium	7.21	19	No				774	data	23
Anacardium occidentale	Anacarde	11.42	35	No				775	data	23
Anacardium occidentale	Anacarde	10.24	39	No				776	data	23
Theobroma cocoa	Cacao	6.71	20	No				777	data	23
Anacardium occidentale	Anacarde	5.23	13	No				778	data	23
Theobroma cocoa	Cacao	10.47	29	No				779	data	23
Anacardium occidentale	Anacarde	7.43	29	No				780	data	23
Theobroma cocoa	Cacao	7.53	28	No				781	data	23
Anacardium occidentale	Anacarde	12.23	72	No				782	data	24
Anacardium occidentale	Anacarde	11.97	65	No				783	data	24
Anacardium occidentale	Anacarde	11.74	57	No				784	data	24
Anacardium occidentale	Anacarde	12.23	66	No				785	data	24
Anacardium occidentale	Anacarde	10.2	65	No				786	data	24
Anacardium occidentale	Anacarde	9.47	41	No				787	data	24
Anacardium occidentale	Anacarde	10.24	51	No				788	data	24
Anacardium occidentale	Anacarde	9.63	49	No				789	data	24
Anacardium occidentale	Anacarde	10.7	47	No				790	data	24
Anacardium occidentale	Anacarde	10.06	42	No				791	data	24
Anacardium occidentale	Anacardium	11.09	53	No				792	data	24
Ficus etrangleur	No	19.54	175	No				793	data	24
Ficus vallis-choudae	Ficus	34.25	289	Big trees				794	data	24
Raphia hookeri	Raphia	17.58	79	No				795	data	24
Anacardium occidentale	Anacarde	11.47	79	No				796	data	24
Anacardium occidentale	Anacarde	9.75	56	No				797	data	24
Anacardium occidentale	Anacarde	11.07	58	No				798	data	24
Anacardium occidentale	Anacarde	9.45	44	No				799	data	24
Theobroma cocoa	Cacao	5.23	18	No				800	data	24
Coffea	Café	7.42	22	No				801	data	24
Coffea canephora	Café	7.42	36	No				802	data	24
Coffea	Café	6.25	32	No				803	data	24
Theobroma cocoa	Cacao	7.12	23	No				804	data	24
Anacardium occidentale	Anacarde	10.53	56	No				805	data	24
Anacardium occidentale	Anacarde	6.58	22	No				806	data	24
Theobroma cocoa	Cacao	11.08	40	No				807	data	24
Coffea canephora	Cafe	7.23	19	No				808	data	24
Anacardium occidentale	Anacardium	11.47	63	No				809	data	24
Coffea canephora	Café	7.42	37	No				810	data	24
Coffea canephora	Café	6.8	24	No				811	data	24
Coffea canephora	Café	6.14	20	No				812	data	24
Coffea canephora	Cafe	6.78	27	No				813	data	24
Theobroma cocoa	Cacao	6.47	19	No				814	data	24
Coffea canephora	Cafe	7.01	19	No				815	data	24
Theobroma cocoa	Cacao	6.9	27	No				816	data	24
Anacardium occidentale	Anacarde	8.47	44	No				817	data	24
Coffea canephora	Café	6.28	17	No				818	data	24
Anacardium occidentale	Anacarde	11.04	69	No				819	data	24
Coffea canephora	Café	6.47	37	No				820	data	24
Hevea brasiliensis	Hevea	13.24	58	No				821	data	25
Hevea brasiliensis	Hevea	12.53	53	No				822	data	25
Hevea brasiliensis	Hevea	11.35	55	No				823	data	25
Hevea brasiliensis	Hevea	10.53	57	No				824	data	25
Hevea brasiliensis	Hevea	13.24	53	No				825	data	25
Hevea brasiliensis	Hevea	12.25	57	No				826	data	25
Hevea brasiliensis	Hevea	11.09	48	No				827	data	25
Hevea brasiliensis	Heva	10.87	32	No				828	data	25
Hevea brasiliensis	Hevea	11.24	52	No				829	data	25
Hevea brasiliensis	Hevea	10.63	17	No				830	data	25
Hevea brasiliensis	Hevea	11.75	61	No				831	data	25
Hevea brasiliensis	Hevea	10.89	58	No				832	data	25
Hevea brasiliensis	Hevea	12.56	50	No				833	data	25
Hevea brasiliensis	Hevea	12.8	63	No				834	data	25
Hevea brasiliensis	Heva	10.78	59	No				835	data	25
Hevea brasiliensis	Hevea	11.7	44	No				836	data	25
Hevea brasiliensis	Hevea	12.68	72	No				837	data	25
Hevea brasiliensis	Hevea	11.9	49	No				838	data	25
Hevea brasiliensis	Hello	13.08	58	No				839	data	25
Hevea brasiliensis	Hevea	12.8	62	No				840	data	25
Hevea brasiliensis	Hevea	12.47	53	No				841	data	25
Hevea brasiliensis	Hevea	13.07	65	No				842	data	25
Hevea brasiliensis	No	13.52	80	No				843	data	25
Hevea brasiliensis	Hevea	11.86	52	No				844	data	25
Hevea brasiliensis	Hevea	12.03	38	No				845	data	25
Hevea brasiliensis	Hevea	13.09	58	No				846	data	25
Hevea brasiliensis	Hevea	11.98	46	No				847	data	25
Hevea brasiliensis	Hévéa	10.9	47	No				848	data	25
Hevea brasiliensis	Hevea	13.41	71	No				849	data	25
Hevea brasiliensis	Hevea	13.02	51	No				850	data	25
Hevea brasiliensis	Hevea	11.63	58	No				851	data	25
Hevea brasiliensis	Hevea	12.65	69	No				852	data	25
Hevea brasiliensis	Hevea	13.71	69	No				853	data	25
Hevea brasiliensis	Hevea	12.75	58	No				854	data	25
Hevea brasiliensis	Hevea	13.5	59	No				855	data	25
Hevea brasiliensis	Hevea	11.52	52	No				856	data	25
Hevea brasiliensis	Hevea	13.72	83	No				857	data	25
Hevea brasiliensis	Hev	12.51	60	No				858	data	25
Hevea brasiliensis	Hevea	11.68	53	No				859	data	25
Hevea brasiliensis	Hévéa	13.8	56	No				860	data	25
Hevea brasiliensis	Hevea	12.04	69	No				861	data	25
Hevea brasiliensis	Hevea	12.32	69	No				862	data	25
Hevea brasiliensis	Hevea	12.23	44	No				863	data	25
Hevea brasiliensis	Hévéa	11.53	44	No				864	data	25
Hevea brasiliensis	Hevea	11.74	48	No				865	data	25
Hevea brasiliensis	Hev	12.53	49	No				866	data	25
Hevea brasiliensis	Hevea	13.38	51	No				867	data	25
Hevea brasiliensis	Hevea	11.47	59	No				868	data	25
Hevea brasiliensis	Hevea	12.25	44	No				869	data	25
Hevea brasiliensis	Hevea	11.56	46	No				870	data	25
Hevea brasiliensis	Hevea	13.01	62	No				871	data	25
Hevea brasiliensis	Hevea	12.35	47	No				872	data	25
Hevea brasiliensis	Hevea	13.58	61	No				873	data	25
Hevea brasiliensis	Hevea	12.52	59	No				874	data	25
Hevea brasiliensis	Hevea	13.01	58	No				875	data	25
Hevea brasiliensis	No	11.58	57	No				876	data	25
Hevea brasiliensis	Hevea	12.04	47	No				877	data	25
Hevea brasiliensis	Hevea	11.24	53	No				878	data	25
Hevea brasiliensis	No	12.14	54	No				879	data	25
Hevea brasiliensis	Hevea	13.25	51	No				880	data	25
Hevea brasiliensis	Hevea	12.25	63	No				881	data	25
Hevea brasiliensis	Hevea	12.23	44	No				882	data	25
Hevea brasiliensis	Hevea	12.57	54	No				883	data	25
Hevea brasiliensis	Hevea	10.25	31	No				884	data	25
Hevea brasiliensis	Hevea	11.42	47	No				885	data	25
Hevea brasiliensis	Hevea	12.23	47	No				886	data	25
Hevea brasiliensis	Hevea	11.7	48	No				887	data	25
Hevea brasiliensis	Hevea	12.47	57	No				888	data	25
Hevea brasiliensis	Hevea	10.68	45	No				889	data	25
Coffea canephora	Café	6.72	34	No				890	data	26
Coffea canephora	Cafe	6.58	29	No				891	data	26
Coffea canephora	Café	4.78	39	No				892	data	26
Coffea canephora	Café	5.7	39	No				893	data	26
Elaeis guinnensis	Palmier	7.56	2.51	No				894	data	26
Coffea canephora	Cafe	5.47	28	No				895	data	26
Coffea canephora	Café	5.42	29	No				896	data	26
Coffea canephora	Café	6.47	30	No				897	data	26
Coffea canephora	Café	6.25	38	No				898	data	26
Theobroma cocoa	Cacao	7.01	21	No				899	data	26
Theobroma cocoa	Cacao	8.25	42	No				900	data	26
Coffea canephora	Café	5.74	23	No				901	data	26
Coffea canephora	Café	4.78	26	No				902	data	26
Coffea canephora	No	5.01	23	No				903	data	26
Coffea canephora	Café	4.12	27	No				904	data	26
Coffea canephora	Cafe	5.11	21	No				905	data	26
Coffea canephora	Café	5.21	19	No				906	data	26
Theobroma cocoa	Cacao	8.12	34	No				907	data	26
Coffea canephora	Café	5.69	22	No				908	data	26
Coffea canephora	Café	4.17	25	No				909	data	26
Coffea canephora	Café	4.58	19	No				910	data	26
Theobroma cocoa	Cacao	4.85	25	No				911	data	26
Coffea canephora	Café	5.27	23	No				912	data	26
Coffea canephora	Café	4.46	24	No				913	data	26
Coffea canephora	Café	4.23	13	No				914	data	26
Coffea canephora	Café	4.72	27	No				915	data	26
Coffea canephora	Cacao	4.17	31	No				916	data	26
Coffea canephora	Hevea	4.17	28	No				917	data	26
Coffea canephora	Café	4.11	24	No				918	data	26
Coffea canephora	Café	5	34	No				919	data	26
Coffea canephora	Café	4.86	25	No				920	data	26
Coffea canephora	Café	5.42	31	No				921	data	27
Coffea canephora	Café	5.11	31	No				922	data	27
Coffea canephora	Café	5.76	37	No				923	data	27
Coffea canephora	Cafe	5.24	27	No				924	data	27
Coffea canephora	Café	4.33	29	No				925	data	27
Anacardium occidentale	Anacarde	8.74	41	No				926	data	27
Anacardium occidentale	Anacarde	8.13	45	No				927	data	27
Anacardium occidentale	Anacarde	7.5	57	No				928	data	27
Anacardium occidentale	Anacarde	9.17	53	No				929	data	27
Coffea canephora	Cafe	5.14	31	No				930	data	27
Coffea canephora	Café	4.97	29	No				931	data	27
Anacardium occidentale	Anacarde	9.7	35	No				932	data	27
Anacardium occidentale	An	10.17	40	No				933	data	27
Anacardium occidentale	Anacarde	7.12	18	No				934	data	27
Coffea canephora	Café	4.23	24	No				935	data	27
Anacardium occidentale	Anacarde	9.47	32	No				936	data	27
Anacardium occidentale	Anacarde	7.41	27	No				937	data	27
Anacardium occidentale	Anacarde	10.47	30	No				938	data	27
Anacardium occidentale	Anacarde	10.25	41	No				939	data	27
Anacardium occidentale	Anacarde	8.7	47	No				940	data	27
Anacardium occidentale	Anacarde	9.8	43	No				941	data	27
Anacardium occidentale	Anacarde	11.23	46	No				942	data	27
Theobroma cocoa	Cacao	6.2	18	No				943	data	27
Theobroma cocoa	Cacao	4.9	52	No				944	data	27
Anacardium occidentale	Anacarde	9.13	31	No				945	data	27
Cela nitida	Cola	11.42	41	No				946	data	27
Anacardium occidentale	Anacarde	8.47	34	No				947	data	27
Anacardium occidentale	Anacarde	9.1	29	No				948	data	27
Theobroma cocoa	Cacao	7.3	21	No				949	data	27
Coffea canephora	Cafe	5.6	23	No				950	data	27
Theobroma cocoa	Cacao	9.54	49	No				951	data	27
Anacardium occidentale	Anacarde	8.56	47	No				952	data	27
Coffea canephora	Cafe	4.8	31	No				953	data	27
Theobroma cocoa	Cacao	6.3	28	No				954	data	27
Anacardium	Anacarde	6.8	31	No				955	data	27
Coffea canephora	Cafe	5.52	17	No				956	data	27
Anacardium occidentale	Anacarde	11.42	37	No				957	data	27
Coffea canephora	Café	4.58	19	No				958	data	27
Anacardium occidentale	Anacardium	9.47	51	No				959	data	27
Theobroma cocoa	Cacao	8.71	37	No				960	data	27
Coffea canephora	Café	6.12	29	No				961	data	27
Anacardium occidentale	Anacarde	9.52	64	No				962	data	27
Anacardium occidentale	Anacarde	9.8	59	No				963	data	27
Anacardium occidentale	Anacarde	11.42	61	No				964	data	27
Anacardium occidentale	Anacarde	11.23	64	No				965	data	27
Anacardium occidentale	Anacarde	9.74	51	No				966	data	27
Coffea canephora	Café	11.23	62	No				967	data	27
Anacardium occidentale	Anacarde	9.14	51	No				968	data	27
Anacardium occidentale	Anacarde	11	51	No				969	data	27
